# Supplementary material for: Neurexin 3 is Essential for the Specific Wiring of a Color Pathway in the Mammalian Retina
Source: PubMed Central journal article supplement — bioRxiv. 2024 Jul 31:2023.02.13.527055. Originally published 2023 Feb 14. Preprint. [Version 2] doi: 10.1101/2023.02.13.527055 (PMC10002642; doi:10.1101/2023.02.13.527055), 2024-07-31
Supplement: NIHPP2023.02.13.527055v1-supplement-1.pdf [file NIHPP2023.02.13.527055v1-supplement-1.pdf]

## Supplement

Table S1: Expression values (counts per million) of marker genes in S- and M-cone samples. Low number of marker genes from other cell types indicate little to no contamination. Cone genes were detected as expected.

| Gene          | Average expression in counts per million (cpm) after TMM<br>(trimmed mean of M values) normalization |                         | Expected cell type |
|---------------|------------------------------------------------------------------------------------------------------|-------------------------|--------------------|
|               | Combined S-cone samples                                                                              | Combined M-cone samples |                    |
| <i>Opn1sw</i> | 20681.26 ± 6525.83                                                                                   | 433.94 ± 856.57         | S-cones            |
| <i>Opn1mw</i> | 11.48 ± 11.75                                                                                        | 740.23 ± 186.90         | M-Cones            |
| <i>Cnga3</i>  | 95.22 ± 54.65                                                                                        | 92.33 ± 73.28           | All cones          |
| <i>Cngb3</i>  | 1618.16 ± 457.70                                                                                     | 1249.61 ± 251.12        | All cones          |
| <i>Gnat2</i>  | 2837.57 ± 929.58                                                                                     | 3905.72 ± 777.66        | All cones          |
| <i>Grk7</i>   | 400.83 ± 195.09                                                                                      | 460.50 ± 126.99         | All cones          |
| <i>Cnga1</i>  | 5.28 ± 12.86                                                                                         | 14.23 ± 37.66           | Rods               |
| <i>Cngb1</i>  | 112.44 ± 61.80                                                                                       | 25.05 ± 20.40           | Rods               |
| <i>Gnat1</i>  | 0.00 ± 0.00                                                                                          | 0.02 ± 0.06             | Rods               |
| <i>Grk1</i>   | 3.11 ± 5.58                                                                                          | 2.46 ± 3.85             | Rods               |
| <i>Rho</i>    | 34.65 ± 66.66                                                                                        | 33.61 ± 78.51           | Rods               |
| <i>Gfap</i>   | 0 ± 0                                                                                                | 0.00 ± 0                | Astrocytes         |
| <i>Vsx2</i>   | 3.18 ± 7.80                                                                                          | 0.06 ± 0.11             | Bipolar cells      |
| <i>Rbpms</i>  | 0.061 ± 0.15                                                                                         | 0.90 ± 2.30             | Ganglion cells     |
| <i>Pou4f2</i> | 0 ± 0                                                                                                | 0.00 ± 0                | Ganglion cells     |
| <i>Calb1</i>  | 86.13 ± 137.52                                                                                       | 38.38 ± 34.67           | Horizontal cells   |
| <i>Vim</i>    | 17.49 ± 21.94                                                                                        | 12.95 ± 12.76           | Müller Glia        |

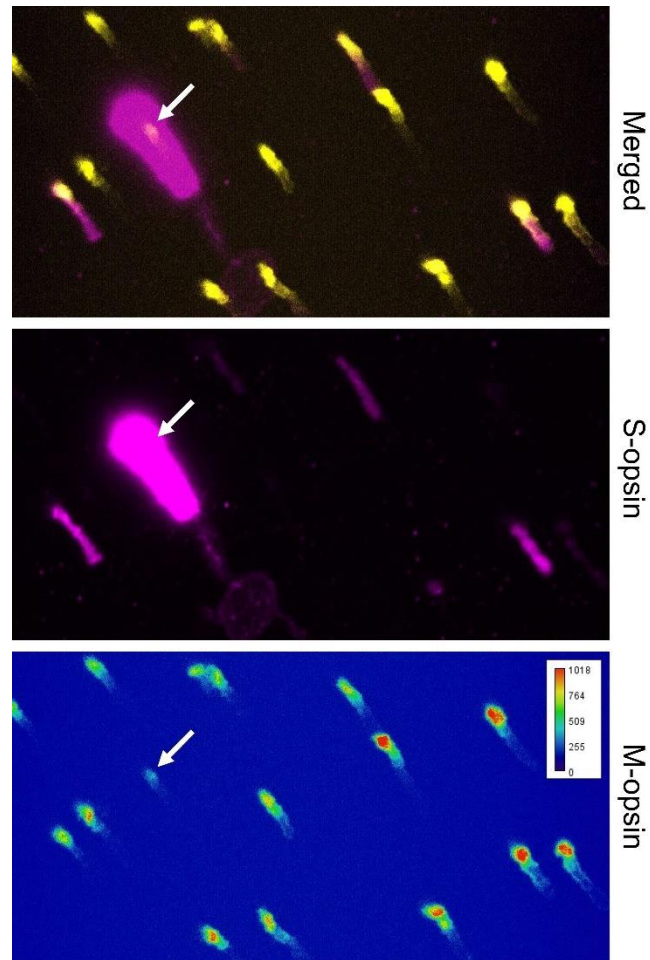

Suppl. Figure S1 This image shows a cone (arrow) that received a clear SCBC contact (not shown here) but was categorized as mixed cone, because its outer segment is S-opsin<sup>+</sup> and M-opsin<sup>+</sup>. The strength of the M-opsin signal appears lower compared to surrounding M-opsin<sup>+</sup> cones.
